## Head-box for CPAP

*To the Editor:*—It has been called to my attention that the use of a head-box in the application of CPAP in infants and children as well as adults was first described by Alvan Barach and his co-workers in 1936 and 1937 (1,2). In my recent editorial (3), I refer to the use of a head-box by Gregory and co-workers for the application of CPAP in infants with respiratory distress syndrome, but failed to point out the prior use of the device by Barach.

I would also recommend to interested readers the excellent review of this subject by Barach and others (4), which describes the history of continuous and intermittent positive pressure breathing in considerable detail.

---

Received from the Department of Anesthesia, University of Pennsylvania School of Medicine, Philadelphia, Pennsylvania 19104.

JOHN J. DOWNES, M.D.

*Director*

*Department of Anesthesia*

*The Children's Hospital of Philadelphia*

*Professor of Anesthesia and Pediatrics*

*University of Pennsylvania*

*Philadelphia, Pennsylvania 19104*

### REFERENCES

1. Barach AL: The therapeutic use of helium. *JAMA* 108:1273-1280, 1936
2. Kernan JD, Barach AL: Role of helium in cases of obstructive lesions in the trachea and larynx. *Arch Otolaryngol* 26:419-447, 1937
3. Downes JJ: CPAP and PEEP—A perspective. *ANESTHESIOLOGY* 44:1-5, 1976
4. Barach AL, Bickerman HA, Petty TL: Perspectives in pressure breathing. *Resp Care* 20:627-642, 1975

(Accepted for publication February 2, 1976.)

## Gastric Juice in Obesity

*To the Editor:*—In the December issue (*ANESTHESIOLOGY* 43:686-689, 1975), Vaughan and Bauer claim to find both a larger volume and a lower pH of gastric juice in obese patients. Unfortunately, they failed to correlate their data with acid-base changes in arterial blood. The obese patient verging upon respiratory insufficiency and CO<sub>2</sub> retention is placed in a more precarious state when given depressant preanesthetic medication (Innovar, 1-2 ml, and diphenhydramine), also in the supine position. Considerable respiratory acidosis could have been present, possibly, therefore, reflected by increased H<sup>+</sup> concentration in gastric juice. Patients in chronic renal failure with metabolic acidosis demonstrate this phenomenon.<sup>1</sup> Increased H<sup>+</sup> is present in the duodenum as well. The gut also acts as a secretory route for urea, the ammoniacal odor on the breath being indicative of NH<sub>3</sub> ion resulting from splitting of the urea molecule. It is questionable, therefore, to advocate rapid or topical intubation of the trachea in every obese patient on the basis of insufficient evidence of this kind.

LEROY D. VANDAM, M.D.

*Professor of Anaesthesia*

*Harvard Medical School*

*Anesthesiologist-in-Chief*

*Peter Bent Brigham Hospital*

### REFERENCE

1. Shepherd AMM, Stewart WK, Thjodleifsson B, et al: Further studies of gastric hypersecretion in chronic renal failure. *Br Med J* 19 January 1974, pp 96-98

(Accepted for publication February 3, 1976.)

*To the Editor:*—We appreciate Dr. Vandam's interest. All 56 of the obese patients (groups IA and IB) had arterial blood-gas studies performed pre- and intraoperatively. These measurements were obtained with the patient breathing room air in the supine position both preoperatively (unpremedicated) and just prior to induction of anesthesia (premedicated). Values for the acid-base variables (mean  $\pm$  SE) in the 50 obese pa-
